# Supplementary material for: Synthesis, fluorescence property and cell imaging of a perylene diimide-based NIR fluorescent probe for hypochlorite with dual-emission fluorescence responses
Source: Royal Society of Chemistry journal article supplement (doi:10.1039/d0ma00131g), 2020-01-01
Supplement: d0ma00131g1.pdf [file d0ma00131g1.pdf]

## Supporting Information

### Synthesis、Fluorescence Property and Cells Imaging of A Perylene Diimide-based NIR Fluorescent Probe for Hypochlorite with Dual-Emission Fluorescence Response

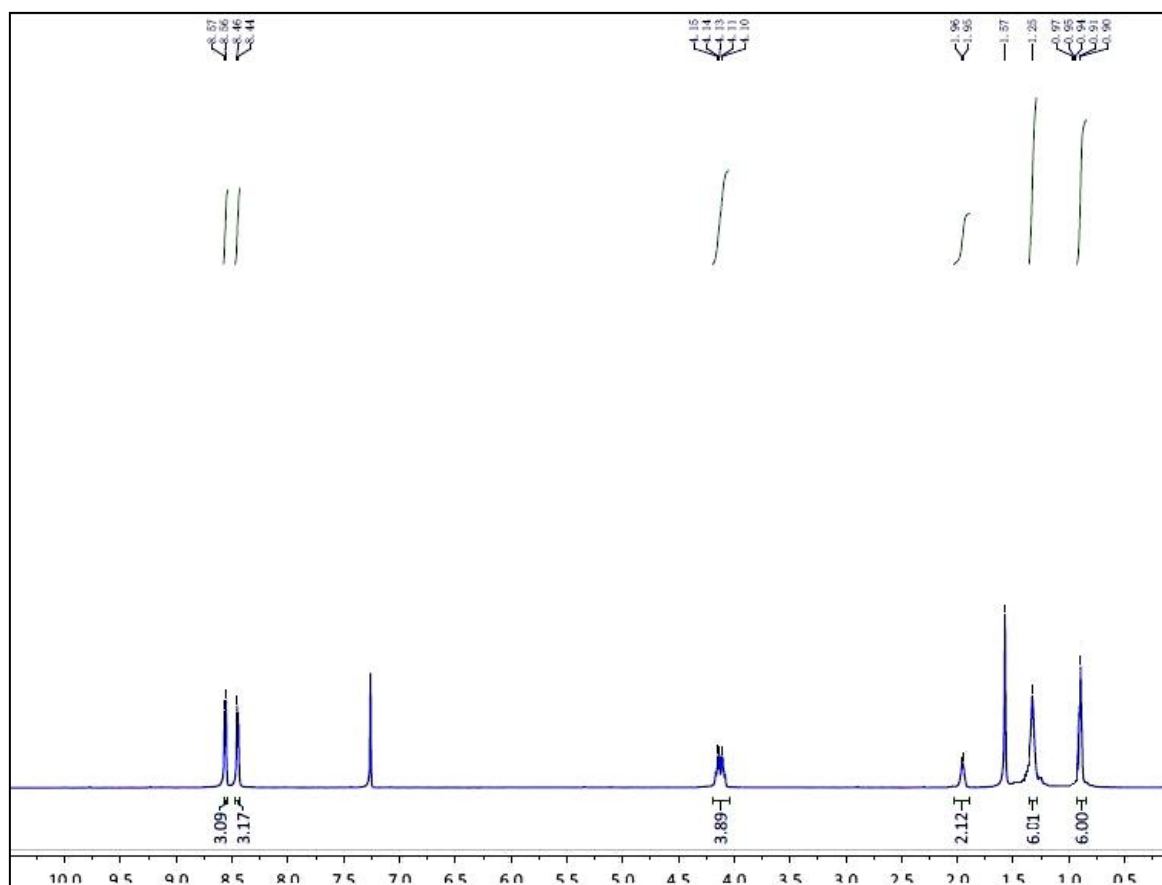

**Fig. S1**  $^1\text{H}$  NMR spectrum of compound **PDI-S**

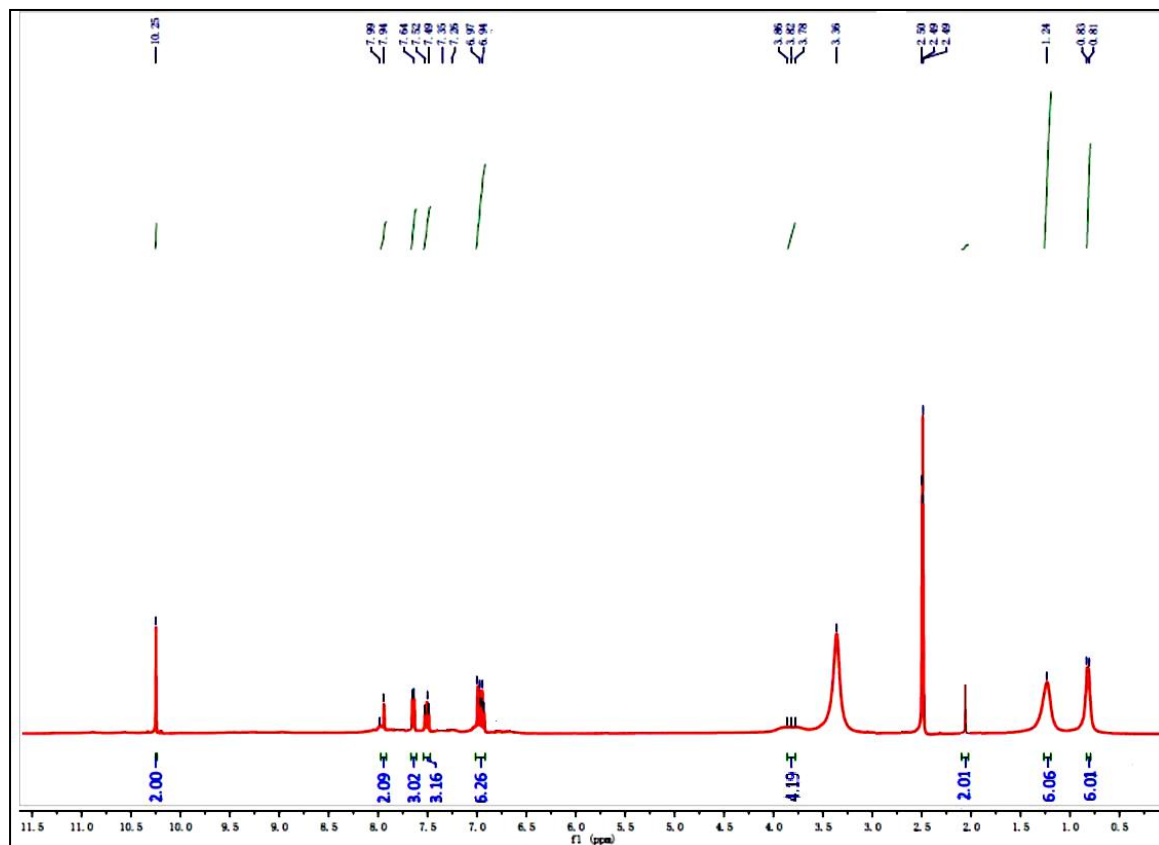

**Fig. S2**  $^1\text{H}$  NMR spectrum of compound **PDI-Y**

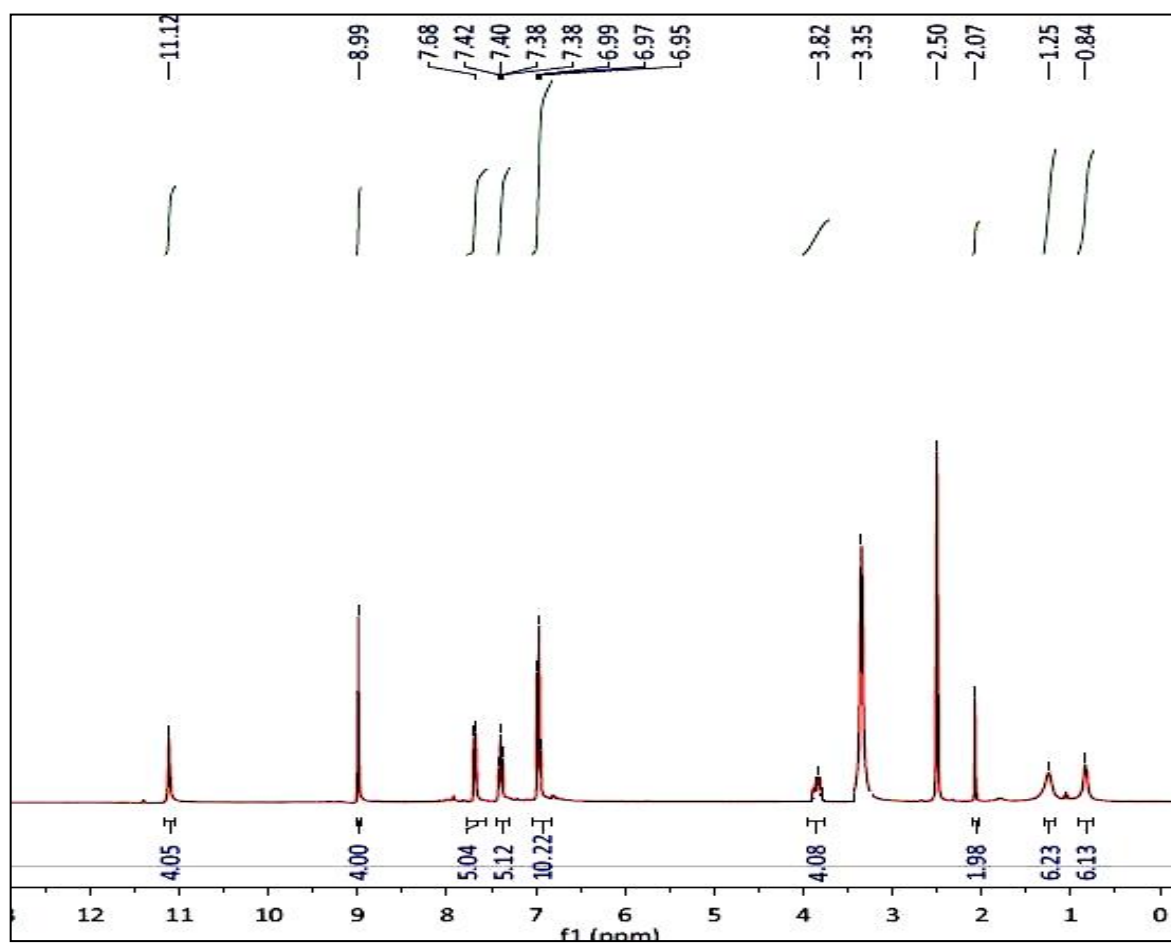

**Fig. S3**  $^1\text{H}$  NMR spectrum of compound **PDI-SY**

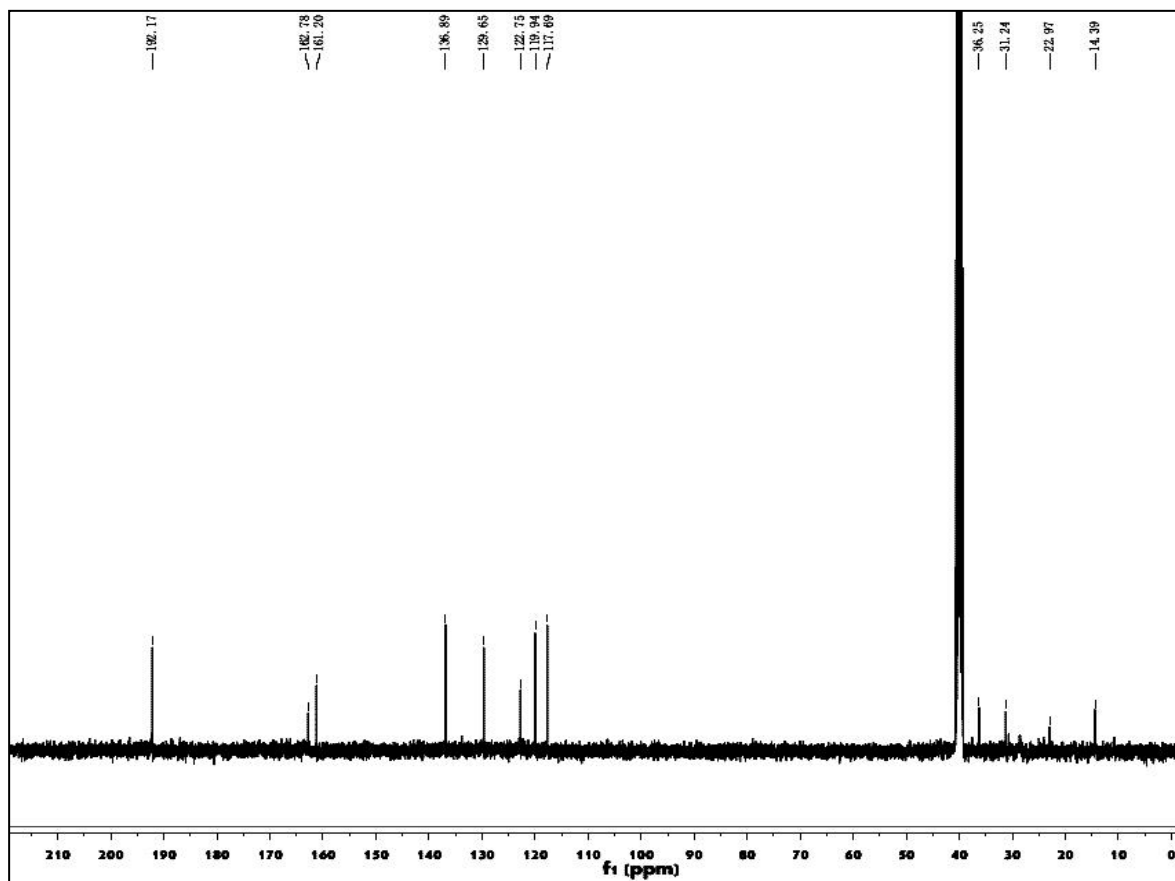

Fig. S4 <sup>13</sup>C NMR spectrum of compound PDI-SY

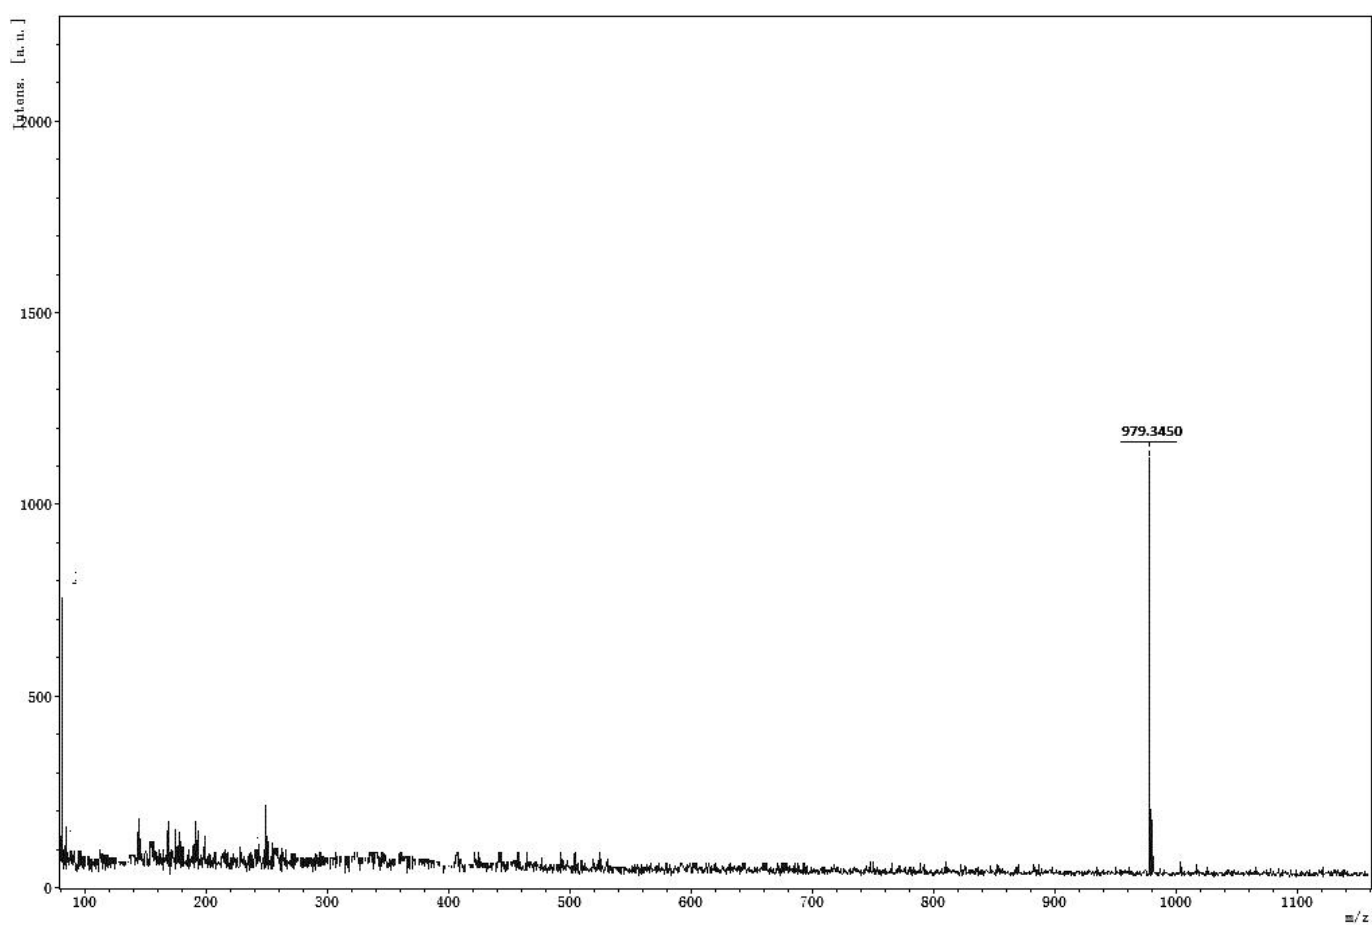

Fig. S5 Mass spectrum of compound PDI-SY

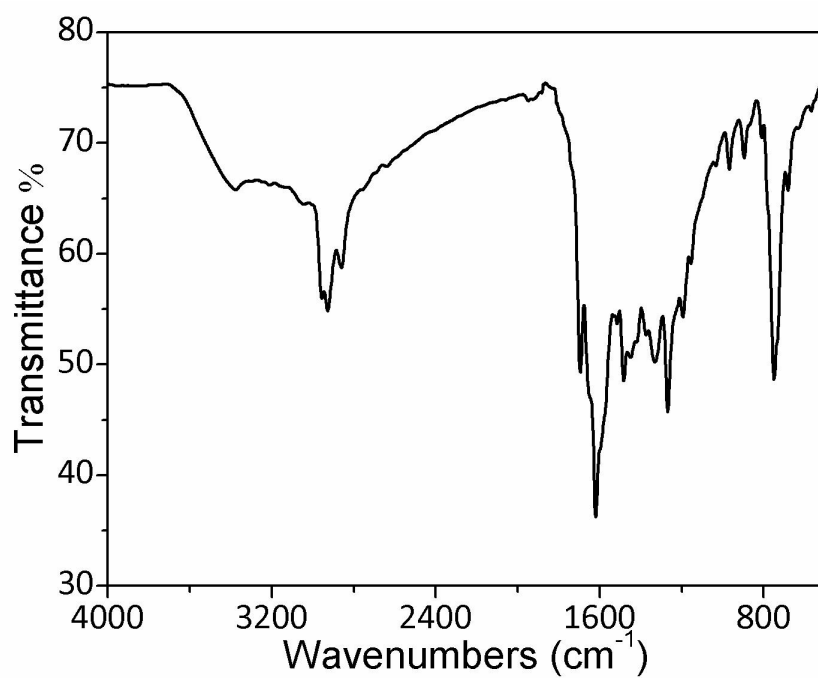

**Fig. S6** FT-IR spectra of compound **PDI-SY**
